# Supplementary material
Source: bioRxiv or medRxiv preprint supplement (https://www.biorxiv.org/highwire/filestream/35592/field_highwire_adjunct_files/0/121277-1.pdf)
Supplement: Supplementary file [file 121277-1.pdf]

# S1 TABLE – Condensed Breedings and Results

## The Cellular Expression and Genetics of an Established Polymorphism in *Poecilia reticulata*; “Purple Body, (*Pb*)” is an Autosomal Dominant Gene

Alan S. Bias and Richard D. Squire

**Breeding Key:** **Strain ID** (description / litter number) x **Strain ID** (description / litter number). All test breeding's listed male x female. All results listed show M/F numbers in each category.

| Male/Female Offspring                                                                                                    |        |         |        |         |           |  |
|--------------------------------------------------------------------------------------------------------------------------|--------|---------|--------|---------|-----------|--|
| Test Breeding No.                                                                                                        |        |         |        |         |           |  |
| Pb                                                                                                                       | non-Pb | Unknown | Totals | Litter# | Offspring |  |
| Generation                                                                                                               |        |         |        |         |           |  |
| 1. <b>C</b> (hetero. or homo. <i>Pb</i> Bias Ginga Sulphureus / P) x <b>A</b> (homo. <i>Pb</i> Roebuck Purple Delta / P) |        |         |        |         |           |  |
| 8/10                                                                                                                     | 0/0    | -/-     | 8/10   | 471     | F1        |  |
| 2. <b>C</b> (hetero. or homo. <i>Pb</i> Bias Ginga Sulphureus / P) x <b>CA</b> (F1 hetero. or homo. <i>Pb</i> / 471)     |        |         |        |         |           |  |
| 15/-                                                                                                                     | 0/-    | -/-     | 15/-   | 524     | TC1       |  |
| 3. <b>CA</b> (F1 hetero. or homo. <i>Pb</i> / 471) x <b>CA</b> (F1 hetero. or homo. <i>Pb</i> / 471)                     |        |         |        |         |           |  |
| 7/-                                                                                                                      | 0/-    | -/-     | 7/-    | 519     | F2        |  |
| 4. <b>C</b> (hetero. or homo. <i>Pb</i> Bias Ginga Sulphureus / P) x <b>A</b> (homo. <i>Pb</i> Roebuck Purple Delta / P) |        |         |        |         |           |  |
| 10/15                                                                                                                    | 0/-    | -/-     | 10/15  | 475     | F1        |  |
| 5. <b>D</b> (homo. non- <i>Pb</i> Bias Panda Moscow / P) x <b>A</b> (homo. <i>Pb</i> Roebuck Purple Delta / P)           |        |         |        |         |           |  |
| 15/10                                                                                                                    | 0/0    | -/-     | 15/10  | 496     | F1        |  |
| 6. <b>D</b> (homo. non- <i>Pb</i> Bias Panda Moscow / P) x <b>DA</b> (F1 hetero. <i>Pb</i> / 496)                        |        |         |        |         |           |  |
| 12/-                                                                                                                     | 7/-    | -/-     | 19/-   | 546     | TC1       |  |
| 7. <b>D/DA</b> (F2 hetero. <i>Pb</i> Purple Panda / 546) x <b>D/DA</b> (F2 hetero. <i>Pb</i> Purple Panda / 546)         |        |         |        |         |           |  |
| 5/11                                                                                                                     | 5/3    | -/3     | 10/17  | 614     | F2        |  |
| 8. <b>D/DA</b> (F2 hetero. <i>Pb</i> Purple Panda / 546) x <b>B</b> (homo non- <i>Pb</i> Shubel Green Delta / P)         |        |         |        |         |           |  |
| ?/6                                                                                                                      | ?/8    | 17/1    | 17/15  | 618     | TC2       |  |
| 9. <b>E</b> (hetero. <i>Pb</i> Bias Vienna LS / P) x <b>F</b> (homo. non- <i>Pb</i> Magoschitz Vienna DS / P)            |        |         |        |         |           |  |
| 21/-                                                                                                                     | 9/-    | -/-     | 30/-   | 680     | F1        |  |
| 10. <b>EF</b> (hetero. <i>Pb</i> Vienna DS / 680) x <b>I</b> (homo. non- <i>Pb</i> Mousseau Green delta / P)             |        |         |        |         |           |  |

|     |                                                                                                                    |      |     |       |     |     |
|-----|--------------------------------------------------------------------------------------------------------------------|------|-----|-------|-----|-----|
|     | 5/2                                                                                                                | 6/1  | -/5 | 11/8  | 782 | TC2 |
| 11. | <b>EF</b> ( <i>hetero. Pb Vienna DS / 680</i> ) x <b>I</b> ( <i>homo. non-Pb Mousseau Green delta / P</i> )        |      |     |       |     |     |
|     | 5/3                                                                                                                | 6/2  | -/4 | 11/9  | 762 | TC2 |
| 12. | <b>E</b> ( <i>hetero. Pb Bias Vienna LS / P</i> ) x <b>F</b> ( <i>homo. non-Pb Magoschitz Vienna DS / P</i> )      |      |     |       |     |     |
|     | 10/-                                                                                                               | 12/- | -/- | 22/-  | 699 | F1  |
| 13. | <b>E</b> ( <i>hetero. Pb Bias Vienna LS / P</i> ) x <b>F</b> ( <i>homo. non-Pb Magoschitz Vienna DS / P</i> )      |      |     |       |     |     |
|     | 12/-                                                                                                               | 7/-  | -/- | 19/-  | 687 | F1  |
| 14. | <b>E</b> ( <i>hetero. Pb Bias Vienna LS / P</i> ) x <b>F</b> ( <i>homo. non-Pb Magoschitz Vienna DS / P</i> )      |      |     |       |     |     |
|     | 5/-                                                                                                                | 7/-  | -/- | 12/-  | 694 | F1  |
| 15. | <b>G</b> ( <i>hetero. Pb Bias Red LS / P</i> ) x <b>G</b> ( <i>homo. non-Pb Bias Red DS / P</i> )                  |      |     |       |     |     |
|     | 8/-                                                                                                                | 6/-  | -/- | 14/-  | 703 | F1  |
| 16. | <b>H</b> ( <i>homo. Pb Mousseau Purple delta / P</i> ) x <b>I</b> ( <i>homo. non-Pb Mousseau Green delta / P</i> ) |      |     |       |     |     |
|     | 15/15                                                                                                              | 0/0  | -/- | 15/15 | 753 | F1  |
| 17. | <b>H</b> ( <i>homo. Pb Mousseau Purple delta / P</i> ) x <b>I</b> ( <i>homo. non-Pb Mousseau Green delta / P</i> ) |      |     |       |     |     |
|     | 25/27                                                                                                              | 0/0  | -/- | 25/27 | 764 | F1  |
| 18. | <b>H</b> ( <i>homo. Pb Mousseau Purple delta / P</i> ) x <b>I</b> ( <i>homo. non-Pb Mousseau Green delta / P</i> ) |      |     |       |     |     |
|     | 13/12                                                                                                              | 0/0  | -/- | 13/12 | 768 | F1  |
| 19. | <b>J</b> ( <i>homo. non-Pb Anderson Green delta / P</i> ) x <b>K</b> ( <i>homo. Pb Anderson Purple delta / P</i> ) |      |     |       |     |     |
|     | 15/14                                                                                                              | 0/0  | -/- | 15/14 | 800 | F1  |
| 20. | <b>J</b> ( <i>homo. non-Pb Anderson Green delta / P</i> ) x <b>K</b> ( <i>homo. Pb Anderson Purple delta / P</i> ) |      |     |       |     |     |
|     | 1/5                                                                                                                | 0/0  | -/- | 1/5   | 805 | F1  |
| 21. | <b>J</b> ( <i>homo. non-Pb Anderson Green delta / P</i> ) x <b>K</b> ( <i>homo. Pb Anderson Purple delta / P</i> ) |      |     |       |     |     |
|     | 3/6                                                                                                                | 0/0  | -/- | 3/6   | 806 | F1  |
